# Supplementary material
Source: PubMed Central journal article supplement (PMC10147730)
Supplement: 41467_2023_37990_MOESM2_ESM.pdf [file 41467_2023_37990_MOESM2_ESM.pdf]

## **Description of additional supplementary files**

**Supplementary Movie 1:** Video of neutrophil and platelet adhesion to the mesentery of an LPS-only treated mouse. Neutrophils are labelled with Brilliant Violet 421 Ly6G<sup>+</sup> (blue) and platelets are labelled with anti-GP1b DyLight 649 (red).

**Supplementary Movie 2:** Video showing no neutrophil and minimal platelet adhesion to the mesentery for a non-LPS control mouse. Neutrophils are labelled with Brilliant Violet 421 Ly6G<sup>+</sup> (blue) and platelets are labelled with anti-GP1b DyLight 649 (red).

**Supplementary Movie 3:** Video of neutrophil and platelet adhesion to the mesentery in an LPS-treated mouse receiving a UT prevention particle treatment. Neutrophils are labelled with Brilliant Violet 421 Ly6G<sup>+</sup> (blue), platelets are labelled with anti-GP1b DyLight 649 (red), and PS particles are labelled with FITC (green).

**Supplementary Movie 4:** Video of neutrophil and platelet adhesion to the mesentery in an LPS-treated mouse receiving a UT intervention particle treatment. Neutrophils are labelled with Brilliant Violet 421 Ly6G<sup>+</sup> (blue), platelets are labelled with anti-GP1b DyLight 649 (red), and PS particles are labelled with FITC (green).

**Supplementary Movie 5:** Video of neutrophil and platelet adhesion to the mesentery in an LPS-treated mouse receiving a T intervention particle treatment. Neutrophils are labelled with Brilliant Violet 421 Ly6G<sup>+</sup> (blue), platelets are labelled with anti-GP1b DyLight 649 (red), and PS particles are labelled with FITC (green).

**Supplementary Movie 6:** Video demonstrating minimal neutrophil and platelet adhesion to the mesentery in a neutrophil-depleted, LPS-treated mouse. Neutrophils are labelled with Brilliant Violet 421 Ly6G<sup>+</sup> (blue) and platelets are labelled with anti-GP1b DyLight 649 (red).

**Supplementary Movie 7:** Video demonstrating minimal neutrophil and platelet adhesion to the mesentery in a neutrophil-depleted, LPS-treated mouse receiving a UT prevention particle treatment. Neutrophils are labelled with Brilliant Violet 421 Ly6G<sup>+</sup> (blue), platelets are labelled with anti-GP1b DyLight 649 (red), and PS particles are labelled with FITC (green).

**Supplementary Movie 8:** Video of neutrophil and platelet adhesion to the mesentery in an LPS-treated mouse receiving a UT prevention nanoparticle treatment. Neutrophils are labelled with Brilliant Violet 421 Ly6G<sup>+</sup> (blue), platelets are labelled with anti-GP1b DyLight 649 (red), and PS particles are labelled with FITC (green).

**Supplementary Movie 9:** Video of neutrophil and platelet adhesion to the mesentery in an LPS-treated mouse receiving a UC Poly-A intervention particle treatment. Neutrophils are labelled with Brilliant Violet 421 Ly6G<sup>+</sup> (blue), platelets are labelled with anti-GP1b DyLight 488 (green), and Poly-A particles are labelled with Cy5.5 (red).
